# Supplementary material for: Proteomic Analysis of Exosome-Like Vesicles Isolated From Saliva of the Tick Haemaphysalis longicornis
Source: Front Cell Infect Microbiol. 2020 Oct 22;10:542319. doi: 10.3389/fcimb.2020.542319 (PMC7642894; doi:10.3389/fcimb.2020.542319)
Supplement: Supplementary Table 1 — Protein content of tick-derived EVs identified using MASCOT search engine. [file Table_1.xlsx]

## Sheet: Sheet1
	Protein content of tick-derived EVs identified using MASCOT search engine
	Reference	PepCount	UniquePepCount	CoverPercent	MW	PI
1	tr|E1CAX9|E1CAX9_HAELO Vitellogenin-1 OS=Haemaphysalis longicornis OX=44386 GN=HlVg-1 PE=2 SV=1	93	59	0.3554	196836	6.03
2	tr|B1B544|B1B544_HAELO Vitellogenin-2 OS=Haemaphysalis longicornis OX=44386 GN=HlVg-2 PE=2 SV=1	114	56	0.3489	176290	6.14
3	tr|E1CAY0|E1CAY0_HAELO Vitellogenin-3 OS=Haemaphysalis longicornis OX=44386 GN=HlVg-3 PE=2 SV=1	29	23	0.1511	165071	6.17
4	tr|G9M4L6|G9M4L6_HAELO Vitellogenin-B OS=Haemaphysalis longicornis OX=44386 GN=HlVg-B PE=2 SV=1	21	21	0.0691	325051	6.41
5	tr|A0A224YJB7|A0A224YJB7_9ACAR Alpha-2-macroglobiln splicing variant 1 OS=Rhipicephalus zambeziensis OX=60191 PE=4 SV=1	21	17	0.0961	166439	5.59
6	tr|A0A1E1XEL3|A0A1E1XEL3_9ACAR Putative alpha-macroglobulin (Fragment) OS=Amblyomma aureolatum OX=187763 PE=2 SV=1	16	13	0.0731	165915	5.87
7	tr|A0A023GME3|A0A023GME3_9ACAR Putative vitellogenin-1 (Fragment) OS=Amblyomma triste OX=251400 PE=2 SV=1	18	9	0.0563	153627	5.42
8	tr|A0A023GMC7|A0A023GMC7_9ACAR Putative vitellogenin-1 (Fragment) OS=Amblyomma triste OX=251400 PE=2 SV=1	17	8	0.0625	123402	5.68
9	tr|A0A1E1X349|A0A1E1X349_9ACAR Putative actin related protein 1 OS=Amblyomma aureolatum OX=187763 PE=2 SV=1	27	7	0.1941	41823.4	5.3
10	tr|A0A023FNW2|A0A023FNW2_9ACAR Uncharacterized protein (Fragment) OS=Amblyomma cajennense OX=34607 PE=2 SV=1	8	7	0.0592	82819.6	5.51
11	tr|A0A1Z5LHY7|A0A1Z5LHY7_ORNMO Uncharacterized protein (Fragment) OS=Ornithodoros moubata OX=6938 PE=3 SV=1	9	6	0.268	16751.9	6.83
12	tr|Q19V51|Q19V51_DERVA Hemelipoglycoprotein OS=Dermacentor variabilis OX=34621 PE=2 SV=1	8	6	0.033	177653	6.32
13	tr|B8R3M2|B8R3M2_IXORI Alpha-2-macroglobiln splicing variant 1 OS=Ixodes ricinus OX=34613 PE=2 SV=1	7	6	0.0303	165008	5.74
14	tr|A0A131XF49|A0A131XF49_9ACAR Putative secreted salivary gland peptide OS=Hyalomma excavatum OX=257692 PE=2 SV=1	6	6	0.2771	25174.6	7.86
15	tr|A1IIA9|A1IIA9_HAELO Metalloprotease OS=Haemaphysalis longicornis OX=44386 GN=hlESTMP1 PE=2 SV=1	7	5	0.0621	54891.1	8.75
16	tr|A0A023GLQ0|A0A023GLQ0_9ACAR Uncharacterized protein (Fragment) OS=Amblyomma triste OX=251400 PE=2 SV=1	6	5	0.0517	71981.4	5.67
17	tr|V5H7G7|V5H7G7_IXORI Putative vitellogenin-2 OS=Ixodes ricinus OX=34613 PE=2 SV=1	6	5	0.0255	161480	6.31
18	tr|G8C7A0|G8C7A0_HAELO Lysosomal acid phosphatase OS=Haemaphysalis longicornis OX=44386 PE=2 SV=1	5	5	0.1213	42449.8	6.23
19	tr|L7M721|L7M721_9ACAR Putative lipoprotein amino terminal region OS=Rhipicephalus pulchellus OX=72859 PE=2 SV=1	7	4	0.0252	177720	6.26
20	tr|A0A023GNW9|A0A023GNW9_9ACAR Putative vitellogenin-2 (Fragment) OS=Amblyomma triste OX=251400 PE=2 SV=1	6	4	0.0307	142028	6.41
21	tr|A0A034WXH7|A0A034WXH7_RHIMP Vitellogenin 4 (Fragment) OS=Rhipicephalus microplus OX=6941 PE=4 SV=1	6	4	0.0432	108474	6.4
22	tr|Q2PGH4|Q2PGH4_HAELO Metalloprotease (Fragment) OS=Haemaphysalis longicornis OX=44386 GN=met PE=2 SV=1	5	4	0.1423	30801.3	5.4
23	tr|A0A023GPB4|A0A023GPB4_9ACAR Putative vitellogenin-2 (Fragment) OS=Amblyomma triste OX=251400 PE=2 SV=1	4	4	0.0504	62807.6	5.76
24	tr|A0A131YI50|A0A131YI50_RHIAP Vitellogenin 3 OS=Rhipicephalus appendiculatus OX=34631 PE=4 SV=1	4	4	0.0201	173646	6.9
25	tr|A0A131ZAN1|A0A131ZAN1_RHIAP Small subunit ribosomal protein S27Ae (Fragment) OS=Rhipicephalus appendiculatus OX=34631 PE=4 SV=1	5	3	0.1692	15059.4	9.86
26	tr|A0A023FNM2|A0A023FNM2_9ACAR Putative alpha-2-macroglobulin-like protein OS=Amblyomma cajennense OX=34607 PE=2 SV=1	4	3	0.025	169779	4.98
27	tr|A0A023FUV2|A0A023FUV2_9ACAR Putative vitellogenin-2 OS=Amblyomma cajennense OX=34607 PE=2 SV=1	4	3	0.0168	177207	6.21
28	tr|A0A023FYX2|A0A023FYX2_9ACAR Putative vitellogenin-2 OS=Amblyomma parvum OX=251391 PE=2 SV=1	4	3	0.018	177941	6.2
29	tr|A0A131YGI5|A0A131YGI5_RHIAP Angiotensin-converting enzyme OS=Rhipicephalus appendiculatus OX=34631 PE=3 SV=1	3	3	0.0333	75374.8	5.82
30	tr|A0A224YHA0|A0A224YHA0_9ACAR Alpha-2-macroglobulin splice variant 1 OS=Rhipicephalus zambeziensis OX=60191 PE=4 SV=1	3	3	0.0238	170381	5.07
31	tr|A0A293N8J1|A0A293N8J1_ORNER Elongation factor 1-alpha (Fragment) OS=Ornithodoros erraticus OX=265619 PE=3 SV=1	3	3	0.0606	50717.8	9.12
32	tr|L7S6B3|L7S6B3_HAELO Glutathione peroxidase OS=Haemaphysalis longicornis OX=44386 PE=2 SV=1	3	3	0.1166	25006.1	7.61
33	tr|Q08G07|Q08G07_9ACAR Hq05 OS=Haemaphysalis qinghaiensis OX=297592 PE=2 SV=1	3	3	0.162	19785.5	7.59
34	tr|Q4R194|Q4R194_HAELO Uncharacterized protein HLSG-g33 OS=Haemaphysalis longicornis OX=44386 GN=HLSG-g33 PE=2 SV=1	3	3	0.2459	13936.7	8.98
35	tr|A0A023GCA7|A0A023GCA7_9ACAR Putative vitellogenin-2 (Fragment) OS=Amblyomma triste OX=251400 PE=2 SV=1	3	2	0.0257	94636.7	6.95
36	tr|A0A0C9RRX6|A0A0C9RRX6_AMBAM Histone H2B (Fragment) OS=Amblyomma americanum OX=6943 PE=2 SV=1	3	2	0.1579	12767.7	10.53
37	tr|A0A1E1XQT0|A0A1E1XQT0_9ACAR Putative 5'-nucleotidase (Fragment) OS=Amblyomma sculptum OX=1581419 PE=2 SV=1	3	2	0.0312	64322.4	5.11
38	tr|B5ABL8|B5ABL8_DERVA Hemelipoglycoprotein 2 (Fragment) OS=Dermacentor variabilis OX=34621 PE=2 SV=1	3	2	0.0101	170802	6.43
39	tr|A0A023FTG4|A0A023FTG4_9ACAR Histone H4 (Fragment) OS=Amblyomma parvum OX=251391 PE=2 SV=1	2	2	0.1651	12049	11.33
40	tr|A0A0K8R7R0|A0A0K8R7R0_IXORI Putative ixodes 26 kDa salivary protein OS=Ixodes ricinus OX=34613 PE=2 SV=1	2	2	0.0485	26189.8	6.22
41	tr|A0A109QJ05|A0A109QJ05_RHIMP Tropomyosin OS=Rhipicephalus microplus OX=6941 PE=2 SV=1	2	2	0.0739	33029.4	4.73
42	tr|A0A131XLI6|A0A131XLI6_9ACAR Putative secreted metalloprotease (Fragment) OS=Hyalomma excavatum OX=257692 PE=2 SV=1	2	2	0.0315	58386.9	8.94
43	tr|A0A147BWI1|A0A147BWI1_IXORI Putative tropomyosin-2 isoform 4 (Fragment) OS=Ixodes ricinus OX=34613 PE=4 SV=1	2	2	0.1065	24977	4.87
44	tr|A0A1E1X7A9|A0A1E1X7A9_9ACAR Putative cd73 ecto-5'-nucleotidase (Fragment) OS=Amblyomma aureolatum OX=187763 PE=2 SV=1	2	2	0.0239	65184.2	5.3
45	tr|A0A1E1XKS5|A0A1E1XKS5_9ACAR Putative netrin axonal chemotropic factor (Fragment) OS=Amblyomma sculptum OX=1581419 PE=2 SV=1	2	2	0.0115	194199	5.39
46	tr|A0A1E1XM49|A0A1E1XM49_9ACAR Putative netrin axonal chemotropic factor (Fragment) OS=Amblyomma sculptum OX=1581419 PE=2 SV=1	2	2	0.0058	395890	4.99
47	tr|A0A224YQE4|A0A224YQE4_9ACAR TIL domain containing protein OS=Rhipicephalus zambeziensis OX=60191 PE=4 SV=1	2	2	0.1394	17588.7	4.6
48	tr|A0A224YYX5|A0A224YYX5_9ACAR Microtubule associated complex OS=Rhipicephalus zambeziensis OX=60191 PE=4 SV=1	2	2	0.0045	495860	9.02
49	tr|A0A293M7V9|A0A293M7V9_ORNER Tubulin alpha chain (Fragment) OS=Ornithodoros erraticus OX=265619 PE=3 SV=1	2	2	0.0766	22908.5	5.07
50	tr|A0A2P1DPZ4|A0A2P1DPZ4_HAEFA Glyceraldehyde-3-phosphate dehydrogenase OS=Haemaphysalis flava OX=181088 PE=2 SV=1	2	2	0.048	36058	7.71
51	tr|B7P4A1|B7P4A1_IXOSC Cell adhesion molecule, putative OS=Ixodes scapularis OX=6945 GN=8024405 PE=4 SV=1	2	2	0.013	125914	8.65
52	tr|L7MK84|L7MK84_9ACAR Uncharacterized protein (Fragment) OS=Rhipicephalus pulchellus OX=72859 PE=2 SV=1	2	2	0.0133	175918	5.24
53	tr|A0A023FEZ7|A0A023FEZ7_9ACAR Putative secreted mucin OS=Amblyomma cajennense OX=34607 PE=2 SV=1	46	1	0.0677	15230.8	9.83
54	tr|A0A131Y846|A0A131Y846_IXORI Putative vegetative cell wall protein gp1 (Fragment) OS=Ixodes ricinus OX=34613 PE=2 SV=1	37	1	0.0077	124918	8.6
55	tr|B7QDM9|B7QDM9_IXOSC uncharacterized protein OS=Ixodes scapularis OX=6945 GN=8039684 PE=4 SV=1	28	1	0.0479	21713.8	9.45
56	tr|A0A2R5LAX2|A0A2R5LAX2_9ACAR Putative 60s ribosomal protein l17 (Fragment) OS=Ornithodoros turicata OX=34597 PE=4 SV=1	4	1	0.0333	24235.9	10.61
57	tr|A0A131Z199|A0A131Z199_RHIAP E3 ubiquitin-protein ligase TRIP12 OS=Rhipicephalus appendiculatus OX=34631 PE=4 SV=1	3	1	0.0051	191977	6.41
58	tr|A0A131YU69|A0A131YU69_RHIAP Tick thioester protein OS=Rhipicephalus appendiculatus OX=34631 PE=4 SV=1	3	3	0.0238	170293	5.09
59	tr|A0A023GD09|A0A023GD09_9ACAR Putative lipocalin-2 1 OS=Amblyomma triste OX=251400 PE=2 SV=1	2	1	0.0372	20771.8	4.53
60	tr|A0A2R5L5A1|A0A2R5L5A1_9ACAR Putative ataxin-10 (Fragment) OS=Ornithodoros turicata OX=34597 PE=4 SV=1	2	1	0.0179	49314.4	5.3
61	tr|A0A2R5L9R5|A0A2R5L9R5_9ACAR Putative vitellogenin-1 (Fragment) OS=Ornithodoros turicata OX=34597 PE=4 SV=1	2	1	0.0061	152909	6.06
62	tr|B7PD87|B7PD87_IXOSC uncharacterized protein OS=Ixodes scapularis OX=6945 GN=8028190 PE=4 SV=1	2	1	0.0253	59227.7	8.31
63	tr|L7MIB5|L7MIB5_9ACAR Putative conserved plasma membrane protein (Fragment) OS=Rhipicephalus pulchellus OX=72859 PE=2 SV=1	2	1	0.0067	100023	8.52
64	tr|V5I1U8|V5I1U8_IXORI Uncharacterized protein OS=Ixodes ricinus OX=34613 PE=2 SV=1	2	1	0.0352	30867.9	9.08
65	tr|A0A023FFH9|A0A023FFH9_9ACAR Putative mitochondrial ribosomal protein mrp-s35 (Fragment) OS=Amblyomma cajennense OX=34607 PE=2 SV=1	1	1	0.0403	16740.1	9.73
66	tr|A0A023FHE7|A0A023FHE7_9ACAR Putative ribosomal protein l34 OS=Amblyomma cajennense OX=34607 PE=2 SV=1	1	1	0.0588	13650.1	11.33
67	tr|A0A023FIY1|A0A023FIY1_9ACAR Putative multifunctional chaperone ixodes scapularis multifunctional chaperone (Fragment) OS=Amblyomma cajennense OX=34607 PE=2 SV=1	1	1	0.037	21721.4	5.27
68	tr|A0A023FJK7|A0A023FJK7_9ACAR Putative heat shock protein (Fragment) OS=Amblyomma cajennense OX=34607 PE=2 SV=1	1	1	0.0175	43869	5.51
69	tr|A0A023FKG8|A0A023FKG8_9ACAR Putative lipid exporter abca1 (Fragment) OS=Amblyomma cajennense OX=34607 PE=2 SV=1	1	1	0.0084	92792	6.83
70	tr|A0A023FL62|A0A023FL62_9ACAR Putative f0f1-type atp synthase alpha subunit (Fragment) OS=Amblyomma cajennense OX=34607 PE=2 SV=1	1	1	0.0187	41249.1	9.05
71	tr|A0A023FM97|A0A023FM97_9ACAR Aminopeptidase (Fragment) OS=Amblyomma cajennense OX=34607 PE=2 SV=1	1	1	0.0108	85080.3	5.63
72	tr|A0A023FMG5|A0A023FMG5_9ACAR Putative actin-binding cytoskeleton protein filamin (Fragment) OS=Amblyomma cajennense OX=34607 PE=2 SV=1	1	1	0.0089	120992	7.25
73	tr|A0A023FMK0|A0A023FMK0_9ACAR Aspartate aminotransferase OS=Amblyomma cajennense OX=34607 PE=2 SV=1	1	1	0.0282	47163.7	9.14
74	tr|A0A023FNV3|A0A023FNV3_9ACAR Uncharacterized protein (Fragment) OS=Amblyomma cajennense OX=34607 PE=2 SV=1	1	1	0.0417	21403.5	9.48
75	tr|A0A023FQ63|A0A023FQ63_9ACAR Putative glycine-rich cell wall structural protein 1.8 OS=Amblyomma cajennense OX=34607 PE=2 SV=1	1	1	0.0136	53539.3	10.08
76	tr|A0A023FVG3|A0A023FVG3_9ACAR Angiotensin-converting enzyme (Fragment) OS=Amblyomma parvum OX=251391 PE=2 SV=1	1	1	0.0217	36253.7	5.24
77	tr|A0A023FWZ5|A0A023FWZ5_9ACAR Putative nuclear pore complex protein nup85 (Fragment) OS=Amblyomma parvum OX=251391 PE=2 SV=1	1	1	0.0184	43020.9	4.97
78	tr|A0A023G073|A0A023G073_9ACAR Putative 2-oxoglutarate dehydrogenase e1 subunit (Fragment) OS=Amblyomma parvum OX=251391 PE=2 SV=1	1	1	0.0113	69462.1	5.95
79	tr|A0A023G1E9|A0A023G1E9_9ACAR Putative secreted protein OS=Amblyomma triste OX=251400 PE=2 SV=1	1	1	0.0506	19442.9	8.47
80	tr|A0A023G2A9|A0A023G2A9_9ACAR Putative secreted protein OS=Amblyomma triste OX=251400 PE=2 SV=1	1	1	0.025	42669.1	8.54
81	tr|A0A023G5R2|A0A023G5R2_9ACAR Putative peroxinectin ixodes scapularis peroxinectin (Fragment) OS=Amblyomma triste OX=251400 PE=2 SV=1	1	1	0.0101	88950.8	5.73
82	tr|A0A023G784|A0A023G784_9ACAR Putative peroxinectin ixodes scapularis peroxinectin (Fragment) OS=Amblyomma triste OX=251400 PE=2 SV=1	1	1	0.0122	74365.1	5.85
83	tr|A0A023G858|A0A023G858_9ACAR Uncharacterized protein (Fragment) OS=Amblyomma triste OX=251400 PE=2 SV=1	1	1	0.0257	30683.8	7.13
84	tr|A0A023GD61|A0A023GD61_9ACAR Putative glycosyl hydrolase family 38 (Fragment) OS=Amblyomma triste OX=251400 PE=2 SV=1	1	1	0.013	77173.3	6.1
85	tr|A0A023GE86|A0A023GE86_9ACAR Putative secreted protein 55 (Fragment) OS=Amblyomma triste OX=251400 PE=2 SV=1	1	1	0.0126	78508.8	5.82
86	tr|A0A023GER7|A0A023GER7_9ACAR Histone H2A OS=Amblyomma triste OX=251400 PE=2 SV=1	1	1	0.0652	14681.8	10.75
87	tr|A0A023GFD5|A0A023GFD5_9ACAR Carboxypeptidase (Fragment) OS=Amblyomma triste OX=251400 PE=2 SV=1	1	1	0.0138	56827.1	4.88
88	tr|A0A023GGP0|A0A023GGP0_9ACAR Proteasome subunit alpha type OS=Amblyomma triste OX=251400 PE=2 SV=1	1	1	0.0415	26471.6	4.88
89	tr|A0A023GK80|A0A023GK80_9ACAR Putative cd73 ecto-5'-nucleotidase (Fragment) OS=Amblyomma triste OX=251400 PE=2 SV=1	1	1	0.0156	49964.3	4.79
90	tr|A0A023GM48|A0A023GM48_9ACAR Uncharacterized protein (Fragment) OS=Amblyomma triste OX=251400 PE=2 SV=1	1	1	0.0168	38636.1	7.16
91	tr|A0A023GP15|A0A023GP15_9ACAR Putative heat shock protein OS=Amblyomma triste OX=251400 PE=2 SV=1	1	1	0.0138	84000.5	5.28
92	tr|A0A023GP30|A0A023GP30_9ACAR Putative myosin heavy chain b ixodes scapularis myosin heavy chain b OS=Amblyomma triste OX=251400 PE=2 SV=1	1	1	0.009	88022.1	5.17
93	tr|A0A090X8Z2|A0A090X8Z2_IXORI Putative serine protease inhibitor (Fragment) OS=Ixodes ricinus OX=34613 PE=2 SV=1	1	1	0.06	11044.5	9.97
94	tr|A0A090X9H5|A0A090X9H5_IXORI Putative secreted protein (Fragment) OS=Ixodes ricinus OX=34613 PE=2 SV=1	1	1	0.0494	18942.3	9.3
95	tr|A0A090XCY0|A0A090XCY0_IXORI Putative secreted protein OS=Ixodes ricinus OX=34613 PE=2 SV=1	1	1	0.1125	8390.4	5.27
96	tr|A0A096XIB5|A0A096XIB5_9ACAR Gag-Pro-Pol protein OS=Nuttalliella namaqua OX=1029659 PE=4 SV=1	1	1	0.0167	52073.8	8.74
97	tr|A0A0C9S1T0|A0A0C9S1T0_AMBAM Putative gdp-l-fucose synthetase (Fragment) OS=Amblyomma americanum OX=6943 PE=2 SV=1	1	1	0.0693	25845	6.49
98	tr|A0A0C9SDT7|A0A0C9SDT7_AMBAM Putative major epididymal secretory protein he1 (Fragment) OS=Amblyomma americanum OX=6943 PE=2 SV=1	1	1	0.037	18286.8	9.18
99	tr|A0A0E9Y1Z7|A0A0E9Y1Z7_AMBAM Serine protease inhibitor (Fragment) OS=Amblyomma americanum OX=6943 PE=3 SV=1	1	1	0.0266	28715.4	9.12
100	tr|A0A0K8R456|A0A0K8R456_IXORI Putative ixodes 10 kDa peptide protein OS=Ixodes ricinus OX=34613 PE=2 SV=1	1	1	0.0492	13655.9	8.92
101	tr|A0A0K8R7B1|A0A0K8R7B1_IXORI Putative glutathione s-transferase 1 OS=Ixodes ricinus OX=34613 PE=2 SV=1	1	1	0.0287	27787.7	5.19
102	tr|A0A0K8R869|A0A0K8R869_IXORI Putative secreted protein OS=Ixodes ricinus OX=34613 PE=2 SV=1	1	1	0.0467	25027.6	9.36
103	tr|A0A0K8RAI3|A0A0K8RAI3_IXORI Putative ixodes 8-cys protein OS=Ixodes ricinus OX=34613 PE=2 SV=1	1	1	0.0441	15103.6	9.44
104	tr|A0A0K8RBY4|A0A0K8RBY4_IXORI Peptidyl-prolyl cis-trans isomerase OS=Ixodes ricinus OX=34613 PE=2 SV=1	1	1	0.04	16360.6	8.43
105	tr|A0A0K8RE21|A0A0K8RE21_IXORI Uncharacterized protein OS=Ixodes ricinus OX=34613 PE=2 SV=1	1	1	0.0442	13327.3	9.85
106	tr|A0A0K8RF92|A0A0K8RF92_IXORI Putative salp15 OS=Ixodes ricinus OX=34613 PE=2 SV=1	1	1	0.0714	10802.8	8.88
107	tr|A0A0K8RNX7|A0A0K8RNX7_IXORI Putative m13 family peptidase (Fragment) OS=Ixodes ricinus OX=34613 PE=2 SV=1	1	1	0.0121	85235.3	9.23
108	tr|A0A0K8RP93|A0A0K8RP93_IXORI Uncharacterized protein (Fragment) OS=Ixodes ricinus OX=34613 PE=2 SV=1	1	1	0.0635	13648.1	8.16
109	tr|A0A0K8RQB8|A0A0K8RQB8_IXORI Dihydrolipoyl dehydrogenase (Fragment) OS=Ixodes ricinus OX=34613 PE=2 SV=1	1	1	0.0184	57888.7	8.14
110	tr|A0A131XD25|A0A131XD25_9ACAR Putative down syndrome cell adhesion molecule-like protein 1 (Fragment) OS=Hyalomma excavatum OX=257692 PE=2 SV=1	1	1	0.0098	68248.2	6.08
111	tr|A0A131XGJ9|A0A131XGJ9_9ACAR Putative ftsj-like rna methyltransferase (Fragment) OS=Hyalomma excavatum OX=257692 PE=2 SV=1	1	1	0.0071	112461	6.04
112	tr|A0A131XHZ9|A0A131XHZ9_9ACAR Putative conserved plasma membrane protein OS=Hyalomma excavatum OX=257692 PE=2 SV=1	1	1	0.0485	25955.5	9.58
113	tr|A0A131XQ06|A0A131XQ06_IXORI Putative cr1-3 is (Fragment) OS=Ixodes ricinus OX=34613 PE=2 SV=1	1	1	0.0149	62238	9.52
114	tr|A0A131XTS6|A0A131XTS6_IXORI Putative conserved plasma membrane protein OS=Ixodes ricinus OX=34613 PE=2 SV=1	1	1	0.0192	41711.3	6.79
115	tr|A0A131XU72|A0A131XU72_IXORI Putative hydroxysteroid dehydrogenase-like protein 2 OS=Ixodes ricinus OX=34613 PE=2 SV=1	1	1	0.0214	44974.8	8.36
116	tr|A0A131XUE0|A0A131XUE0_IXORI Putative component of histone deacetyl OS=Ixodes ricinus OX=34613 PE=2 SV=1	1	1	0.0311	30090	4.92
117	tr|A0A131XUF4|A0A131XUF4_IXORI Uncharacterized protein (Fragment) OS=Ixodes ricinus OX=34613 PE=2 SV=1	1	1	0.0304	26108.3	7.13
118	tr|A0A131XVI9|A0A131XVI9_IXORI Putative rna helicase brr2 dead-box superfamily protein OS=Ixodes ricinus OX=34613 PE=2 SV=1	1	1	0.0032	245955	6.46
119	tr|A0A131XZ89|A0A131XZ89_IXORI Alpha-mannosidase (Fragment) OS=Ixodes ricinus OX=34613 PE=2 SV=1	1	1	0.0099	114144	6.66
120	tr|A0A131Y031|A0A131Y031_IXORI Putative e3 ubiquitin ligase OS=Ixodes ricinus OX=34613 PE=2 SV=1	1	1	0.0316	45850.3	6.98
121	tr|A0A131Y3N9|A0A131Y3N9_IXORI Putative secreted protein (Fragment) OS=Ixodes ricinus OX=34613 PE=2 SV=1	1	1	0.0214	47372.9	9.35
122	tr|A0A131Y4D7|A0A131Y4D7_IXORI Putative catalytically inactive chitinase-like lectin (Fragment) OS=Ixodes ricinus OX=34613 PE=2 SV=1	1	1	0.0242	41015.9	7.81
123	tr|A0A131Y4M1|A0A131Y4M1_IXORI Putative tick transposon (Fragment) OS=Ixodes ricinus OX=34613 PE=2 SV=1	1	1	0.0106	75326.7	9.5
124	tr|A0A131YBT2|A0A131YBT2_IXORI Uncharacterized protein (Fragment) OS=Ixodes ricinus OX=34613 PE=2 SV=1	1	1	0.0635	14509.1	9.26
125	tr|A0A131YBV8|A0A131YBV8_RHIAP Rho gtpase binding protein OS=Rhipicephalus appendiculatus OX=34631 PE=4 SV=1	1	1	0.0068	117804	8.31
126	tr|A0A131YIB9|A0A131YIB9_RHIAP Transcriptional regulator ATRX OS=Rhipicephalus appendiculatus OX=34631 PE=4 SV=1	1	1	0.0056	236649	6.36
127	tr|A0A131YIT6|A0A131YIT6_RHIAP Pancreatic trypsin inhibitor OS=Rhipicephalus appendiculatus OX=34631 PE=4 SV=1	1	1	0.0595	18970.4	9.25
128	tr|A0A131YJW5|A0A131YJW5_RHIAP Uncharacterized protein OS=Rhipicephalus appendiculatus OX=34631 PE=4 SV=1	1	1	0.0166	67312.1	6.76
129	tr|A0A131YKC6|A0A131YKC6_RHIAP Uncharacterized protein OS=Rhipicephalus appendiculatus OX=34631 PE=4 SV=1	1	1	0.0184	42166.9	8.55
130	tr|A0A131YNN3|A0A131YNN3_RHIAP 15-hydroxyprostaglandin dehydrogenase (NAD) OS=Rhipicephalus appendiculatus OX=34631 PE=3 SV=1	1	1	0.0504	28481.5	6.98
131	tr|A0A131YPA8|A0A131YPA8_RHIAP Peptidylprolyl isomerase OS=Rhipicephalus appendiculatus OX=34631 PE=4 SV=1	1	1	0.0096	78460.6	7.23
132	tr|A0A131YPM9|A0A131YPM9_RHIAP BTB/POZ domain-containing protein 13 (Germ cell-less protein-like 1) OS=Rhipicephalus appendiculatus OX=34631 PE=4 SV=1	1	1	0.014	49818.7	5.02
133	tr|A0A131YQ62|A0A131YQ62_RHIAP Lipocalin OS=Rhipicephalus appendiculatus OX=34631 PE=4 SV=1	1	1	0.0595	20592	5.04
134	tr|A0A131YR95|A0A131YR95_RHIAP Amidase OS=Rhipicephalus appendiculatus OX=34631 PE=4 SV=1	1	1	0.0169	58179.6	8.48
135	tr|A0A131YRQ6|A0A131YRQ6_RHIAP Peroxinectin ixodes scapularis peroxinectin OS=Rhipicephalus appendiculatus OX=34631 PE=4 SV=1	1	1	0.0124	89465	5.96
136	tr|A0A131YU15|A0A131YU15_RHIAP Small subunit ribosomal protein S7 OS=Rhipicephalus appendiculatus OX=34631 PE=4 SV=1	1	1	0.0345	26403.3	9.33
137	tr|A0A131YUB4|A0A131YUB4_RHIAP Inner centromere protein OS=Rhipicephalus appendiculatus OX=34631 PE=4 SV=1	1	1	0.0116	93086.2	10.01
138	tr|A0A131YY80|A0A131YY80_RHIAP Heat shock 70 kDa protein OS=Rhipicephalus appendiculatus OX=34631 PE=3 SV=1	1	1	0.0124	89785	5.77
139	tr|A0A131Z1Q9|A0A131Z1Q9_RHIAP Uncharacterized protein OS=Rhipicephalus appendiculatus OX=34631 PE=4 SV=1	1	1	0.092	9331.95	5.42
140	tr|A0A131Z256|A0A131Z256_RHIAP Lipocalin OS=Rhipicephalus appendiculatus OX=34631 PE=4 SV=1	1	1	0.0392	23121	9.28
141	tr|A0A131Z5F0|A0A131Z5F0_RHIAP Guanine nucleotide releasing factor OS=Rhipicephalus appendiculatus OX=34631 PE=4 SV=1	1	1	0.0152	95601	9.03
142	tr|A0A131Z678|A0A131Z678_RHIAP TIL domain containing protein (Fragment) OS=Rhipicephalus appendiculatus OX=34631 PE=4 SV=1	1	1	0.0048	204975	5.29
143	tr|A0A131Z8G9|A0A131Z8G9_RHIAP Uncharacterized protein (Fragment) OS=Rhipicephalus appendiculatus OX=34631 PE=4 SV=1	1	1	0.0373	18566.1	9.53
144	tr|A0A131Z957|A0A131Z957_RHIAP Uncharacterized protein (Fragment) OS=Rhipicephalus appendiculatus OX=34631 PE=4 SV=1	1	1	0.0111	81633.9	9.91
145	tr|A0A131ZA86|A0A131ZA86_RHIAP Uncharacterized protein (Fragment) OS=Rhipicephalus appendiculatus OX=34631 PE=4 SV=1	1	1	0.0247	27844.9	7.56
146	tr|A0A131ZAG7|A0A131ZAG7_RHIAP Zinc knuckle domain containing protein (Fragment) OS=Rhipicephalus appendiculatus OX=34631 PE=4 SV=1	1	1	0.0216	31287.6	8.75
147	tr|A0A131ZB57|A0A131ZB57_RHIAP Ankyrin repeat domain-containing protein 17 (Fragment) OS=Rhipicephalus appendiculatus OX=34631 PE=4 SV=1	1	1	0.0032	227170	6.32
148	tr|A0A131ZBU0|A0A131ZBU0_RHIAP Uncharacterized protein (Fragment) OS=Rhipicephalus appendiculatus OX=34631 PE=4 SV=1	1	1	0.0652	10933	9.27
149	tr|A0A131ZD23|A0A131ZD23_RHIAP Reprolysin (Fragment) OS=Rhipicephalus appendiculatus OX=34631 PE=4 SV=1	1	1	0.0349	28710.7	9.01
150	tr|A0A144IIJ5|A0A144IIJ5_RHIAP Midgut glucoprotein (Fragment) OS=Rhipicephalus appendiculatus OX=34631 GN=Ra86 PE=2 SV=1	1	1	0.0267	65948	7.16
151	tr|A0A147B8W7|A0A147B8W7_9ACAR Centaurin beta (Fragment) OS=Carios mimon OX=360319 PE=4 SV=1	1	1	0.0488	17633.2	4.92
152	tr|A0A147B8Y3|A0A147B8Y3_9ACAR Thioredoxin peroxidase (Fragment) OS=Carios mimon OX=360319 PE=4 SV=1	1	1	0.0279	28096.9	8.45
153	tr|A0A147BAI0|A0A147BAI0_IXORI Putative ral gtpase-activating protein subunit alpha-1 isoform x2 (Fragment) OS=Ixodes ricinus OX=34613 PE=4 SV=1	1	1	0.006	183081	7.97
154	tr|A0A147BC84|A0A147BC84_IXORI Putative receptor for egg jelly 7 (Fragment) OS=Ixodes ricinus OX=34613 PE=4 SV=1	1	1	0.0032	245255	7.94
155	tr|A0A147BCU5|A0A147BCU5_IXORI Putative translation initiation factor 5b eif-5b (Fragment) OS=Ixodes ricinus OX=34613 PE=4 SV=1	1	1	0.0024	322916	5.05
156	tr|A0A147BF25|A0A147BF25_IXORI Uncharacterized protein OS=Ixodes ricinus OX=34613 PE=4 SV=1	1	1	0.0545	12470.7	10
157	tr|A0A147BG35|A0A147BG35_IXORI Putative hemolectin (Fragment) OS=Ixodes ricinus OX=34613 PE=4 SV=1	1	1	0.0046	263012	4.97
158	tr|A0A147BG74|A0A147BG74_IXORI Putative acyltransferase required for palmitoylation of hedgehog hh family of secreted signaling OS=Ixodes ricinus OX=34613 PE=3 SV=1	1	1	0.0124	64772.6	9.63
159	tr|A0A147BHM2|A0A147BHM2_IXORI Putative proline-rich receptor-like protein kinase perk7 (Fragment) OS=Ixodes ricinus OX=34613 PE=4 SV=1	1	1	0.0053	144907	6.36
160	tr|A0A147BJX3|A0A147BJX3_IXORI Uncharacterized protein OS=Ixodes ricinus OX=34613 PE=4 SV=1	1	1	0.0143	53966.9	7.56
161	tr|A0A147BK70|A0A147BK70_IXORI Putative myosin-16 OS=Ixodes ricinus OX=34613 PE=4 SV=1	1	1	0.0148	60475.7	5.8
162	tr|A0A147BLJ8|A0A147BLJ8_IXORI Putative focal adhesion tyrosine kinase fak (Fragment) OS=Ixodes ricinus OX=34613 PE=4 SV=1	1	1	0.0056	134447	5.06
163	tr|A0A147BMH7|A0A147BMH7_IXORI Putative complement factor h (Fragment) OS=Ixodes ricinus OX=34613 PE=4 SV=1	1	1	0.0024	315814	5.04
164	tr|A0A147BP71|A0A147BP71_IXORI Elongation of very long chain fatty acids protein OS=Ixodes ricinus OX=34613 PE=3 SV=1	1	1	0.0296	31979.1	9.6
165	tr|A0A147BS85|A0A147BS85_IXORI Putative prolyl 4-hydroxylase alpha subunit (Fragment) OS=Ixodes ricinus OX=34613 PE=4 SV=1	1	1	0.0124	55287.4	8.53
166	tr|A0A147BSL3|A0A147BSL3_IXORI Putative thymidylate synthase (Fragment) OS=Ixodes ricinus OX=34613 PE=3 SV=1	1	1	0.0262	34944.2	5.95
167	tr|A0A147BW77|A0A147BW77_IXORI Putative salivary lipocalin OS=Ixodes ricinus OX=34613 PE=4 SV=1	1	1	0.0273	24664.6	8.34
168	tr|A0A147BWT2|A0A147BWT2_IXORI Putative tick transposon (Fragment) OS=Ixodes ricinus OX=34613 PE=4 SV=1	1	1	0.0068	100349	9.4
169	tr|A0A1D2AHK3|A0A1D2AHK3_ORNBR Uncharacterized protein (Fragment) OS=Ornithodoros brasiliensis OX=888526 PE=4 SV=1	1	1	0.0429	17829.2	9.3
170	tr|A0A1D2AIB1|A0A1D2AIB1_ORNBR Zinc finger protein (Fragment) OS=Ornithodoros brasiliensis OX=888526 PE=4 SV=1	1	1	0.0266	36057.3	5.89
171	tr|A0A1E1WWM0|A0A1E1WWM0_9ACAR Putative a-kinase anchor protein 17a (Fragment) OS=Amblyomma aureolatum OX=187763 PE=2 SV=1	1	1	0.0447	21043.3	11.49
172	tr|A0A1E1WWY7|A0A1E1WWY7_9ACAR Putative cyth domain protein (Fragment) OS=Amblyomma aureolatum OX=187763 PE=2 SV=1	1	1	0.0489	20786.3	5.42
173	tr|A0A1E1WY51|A0A1E1WY51_9ACAR Putative conserved secreted protein (Fragment) OS=Amblyomma aureolatum OX=187763 PE=2 SV=1	1	1	0.0164	44744.6	8.35
174	tr|A0A1E1WYX8|A0A1E1WYX8_9ACAR Putative u4/u6-associated splicing factor prp4 (Fragment) OS=Amblyomma aureolatum OX=187763 PE=2 SV=1	1	1	0.0168	60107.9	9.96
175	tr|A0A1E1X1H2|A0A1E1X1H2_9ACAR Putative vitellogenin-c (Fragment) OS=Amblyomma aureolatum OX=187763 PE=2 SV=1	1	1	0.1224	11343.7	5.81
176	tr|A0A1E1X1V4|A0A1E1X1V4_9ACAR Putative secreted protein OS=Amblyomma aureolatum OX=187763 PE=2 SV=1	1	1	0.0598	12829.5	5.17
177	tr|A0A1E1X2T4|A0A1E1X2T4_9ACAR Putative myosin-2 heavy chain (Fragment) OS=Amblyomma aureolatum OX=187763 PE=2 SV=1	1	1	0.012	78194.8	8.56
178	tr|A0A1E1X4R2|A0A1E1X4R2_9ACAR Uncharacterized protein (Fragment) OS=Amblyomma aureolatum OX=187763 PE=2 SV=1	1	1	0.0153	45063.3	9.84
179	tr|A0A1E1X5W9|A0A1E1X5W9_9ACAR Uncharacterized protein OS=Amblyomma aureolatum OX=187763 PE=2 SV=1	1	1	0.0123	71075.9	9.11
180	tr|A0A1E1X753|A0A1E1X753_9ACAR Uncharacterized protein (Fragment) OS=Amblyomma aureolatum OX=187763 PE=2 SV=1	1	1	0.0208	37782.6	6.6
181	tr|A0A1E1X8M7|A0A1E1X8M7_9ACAR ATP synthase subunit beta (Fragment) OS=Amblyomma aureolatum OX=187763 PE=2 SV=1	1	1	0.0225	57168.9	5.45
182	tr|A0A1E1XAI9|A0A1E1XAI9_9ACAR Putative golgin subfamily protein b member 1 OS=Amblyomma aureolatum OX=187763 PE=2 SV=1	1	1	0.0025	354212	4.97
183	tr|A0A1E1XCT0|A0A1E1XCT0_9ACAR Putative translation initiation factor eif-2b subunit delta-like isoform 1 (Fragment) OS=Amblyomma aureolatum OX=187763 PE=2 SV=1	1	1	0.0085	88531.4	9.34
184	tr|A0A1E1XF25|A0A1E1XF25_9ACAR Putative microtubule-actin cross-linking factor 1-like protein (Fragment) OS=Amblyomma aureolatum OX=187763 PE=2 SV=1	1	1	0.0034	223600	9.2
185	tr|A0A1E1XH80|A0A1E1XH80_9ACAR Putative late golgi protein sorting complex subunit vps53 OS=Amblyomma aureolatum OX=187763 PE=2 SV=1	1	1	0.008	97291.4	5.97
186	tr|A0A1E1XHH3|A0A1E1XHH3_9ACAR Putative pfkb family carbohydrate kinase (Fragment) OS=Amblyomma aureolatum OX=187763 PE=2 SV=1	1	1	0.027	28353.8	4.71
187	tr|A0A1E1XHX5|A0A1E1XHX5_9ACAR Putative titin isoform x2 OS=Amblyomma aureolatum OX=187763 PE=2 SV=1	1	1	0.0019	358859	5.04
188	tr|A0A1E1XHY1|A0A1E1XHY1_9ACAR Putative ribosomal protein l3 (Fragment) OS=Amblyomma aureolatum OX=187763 PE=2 SV=1	1	1	0.0249	31860.8	10.58
189	tr|A0A1E1XIS9|A0A1E1XIS9_9ACAR Putative ribosome-binding protein 1 OS=Amblyomma aureolatum OX=187763 PE=2 SV=1	1	1	0.009	100085	5.66
190	tr|A0A1E1XJE7|A0A1E1XJE7_9ACAR Putative sumo1/sentrin specific peptidase 6a (Fragment) OS=Amblyomma sculptum OX=1581419 PE=2 SV=1	1	1	0.0278	61150.3	9.24
191	tr|A0A1E1XJW5|A0A1E1XJW5_9ACAR Putative conserved plasma membrane protein (Fragment) OS=Amblyomma sculptum OX=1581419 PE=2 SV=1	1	1	0.0258	72204.8	9.45
192	tr|A0A1E1XL54|A0A1E1XL54_9ACAR Putative cell division cycle and apoptosis regulator protein 1 (Fragment) OS=Amblyomma sculptum OX=1581419 PE=2 SV=1	1	1	0.0387	29442.3	8.65
193	tr|A0A1E1XMP5|A0A1E1XMP5_9ACAR Putative e3 ubiquitin-protein ligase herc2 (Fragment) OS=Amblyomma sculptum OX=1581419 PE=2 SV=1	1	1	0.0014	460826	5.76
194	tr|A0A1E1XNB5|A0A1E1XNB5_9ACAR Putative tick transposon (Fragment) OS=Amblyomma sculptum OX=1581419 PE=2 SV=1	1	1	0.0338	17098.3	9.46
195	tr|A0A1E1XPM5|A0A1E1XPM5_9ACAR Putative vegetative cell wall protein gp1 (Fragment) OS=Amblyomma sculptum OX=1581419 PE=2 SV=1	1	1	0.0131	57837.1	5.87
196	tr|A0A1E1XQ99|A0A1E1XQ99_9ACAR Putative egg bindin receptor protein 1 (Fragment) OS=Amblyomma sculptum OX=1581419 PE=2 SV=1	1	1	0.0127	74545.5	5.81
197	tr|A0A1E1XRX6|A0A1E1XRX6_9ACAR Putative 26s proteasome non-atpase regulatory subunit (Fragment) OS=Amblyomma sculptum OX=1581419 PE=2 SV=1	1	1	0.0367	22902.6	7.29
198	tr|A0A1E1XT23|A0A1E1XT23_9ACAR Putative regulation of interferon-beta production (Fragment) OS=Amblyomma sculptum OX=1581419 PE=2 SV=1	1	1	0.0514	19453.8	5.12
199	tr|A0A1E1XUQ4|A0A1E1XUQ4_9ACAR RBR-type E3 ubiquitin transferase (Fragment) OS=Amblyomma sculptum OX=1581419 PE=2 SV=1	1	1	0.0194	40290.4	8.69
200	tr|A0A1Z5KUQ9|A0A1Z5KUQ9_ORNMO Tensin (Fragment) OS=Ornithodoros moubata OX=6938 PE=4 SV=1	1	1	0.0108	101574	7.73
201	tr|A0A1Z5KXX9|A0A1Z5KXX9_ORNMO Uncharacterized protein (Fragment) OS=Ornithodoros moubata OX=6938 PE=4 SV=1	1	1	0.015	53155	9.78
202	tr|A0A1Z5KY25|A0A1Z5KY25_ORNMO Malate dehydrogenase (Fragment) OS=Ornithodoros moubata OX=6938 PE=4 SV=1	1	1	0.0236	40524.3	7.04
203	tr|A0A1Z5KYS5|A0A1Z5KYS5_ORNMO Uncharacterized protein (Fragment) OS=Ornithodoros moubata OX=6938 PE=4 SV=1	1	1	0.036	25625.3	8.71
204	tr|A0A1Z5L0J3|A0A1Z5L0J3_ORNMO Aquaporin (Fragment) OS=Ornithodoros moubata OX=6938 PE=3 SV=1	1	1	0.0124	55026.2	6.29
205	tr|A0A1Z5L0Z6|A0A1Z5L0Z6_ORNMO Enoyl-CoA hydratase (Fragment) OS=Ornithodoros moubata OX=6938 PE=4 SV=1	1	1	0.0874	11790.6	6.28
206	tr|A0A1Z5L384|A0A1Z5L384_ORNMO Uncharacterized protein (Fragment) OS=Ornithodoros moubata OX=6938 PE=4 SV=1	1	1	0.0132	56657.1	4.99
207	tr|A0A1Z5L4K4|A0A1Z5L4K4_ORNMO Uncharacterized protein (Fragment) OS=Ornithodoros moubata OX=6938 PE=4 SV=1	1	1	0.0088	59303.5	5.23
208	tr|A0A1Z5L5I8|A0A1Z5L5I8_ORNMO Uncharacterized protein (Fragment) OS=Ornithodoros moubata OX=6938 PE=4 SV=1	1	1	0.0103	76676.1	9.13
209	tr|A0A1Z5L983|A0A1Z5L983_ORNMO Sulfotransferase (Fragment) OS=Ornithodoros moubata OX=6938 PE=4 SV=1	1	1	0.0188	48290.5	7.32
210	tr|A0A1Z5LAD9|A0A1Z5LAD9_ORNMO Kaptin (Fragment) OS=Ornithodoros moubata OX=6938 PE=4 SV=1	1	1	0.0147	45058.2	5.08
211	tr|A0A1Z5LB75|A0A1Z5LB75_ORNMO Kinesin-like protein (Fragment) OS=Ornithodoros moubata OX=6938 PE=3 SV=1	1	1	0.012	85703.4	8.08
212	tr|A0A1Z5LBQ8|A0A1Z5LBQ8_ORNMO Laminin gamma-1 chain (Fragment) OS=Ornithodoros moubata OX=6938 PE=4 SV=1	1	1	0.0179	43953	4.57
213	tr|A0A1Z5LCN6|A0A1Z5LCN6_ORNMO Gem-associated protein (Fragment) OS=Ornithodoros moubata OX=6938 PE=4 SV=1	1	1	0.0318	31790.3	4.66
214	tr|A0A1Z5LDG0|A0A1Z5LDG0_ORNMO Uncharacterized protein (Fragment) OS=Ornithodoros moubata OX=6938 PE=4 SV=1	1	1	0.0061	125232	8.37
215	tr|A0A1Z5LGI7|A0A1Z5LGI7_ORNMO 60s ribosomal protein L10 (Fragment) OS=Ornithodoros moubata OX=6938 PE=4 SV=1	1	1	0.0543	29461.3	10.39
216	tr|A0A1Z5LH02|A0A1Z5LH02_ORNMO NEU1 protein (Fragment) OS=Ornithodoros moubata OX=6938 PE=4 SV=1	1	1	0.0266	41673.9	7.59
217	tr|A0A1Z5LIJ2|A0A1Z5LIJ2_ORNMO Thioredoxin-dependent peroxide reductase mitochondrial (Fragment) OS=Ornithodoros moubata OX=6938 PE=4 SV=1	1	1	0.0404	21825.5	5.37
218	tr|A0A224Y6E2|A0A224Y6E2_9ACAR Uncharacterized protein OS=Rhipicephalus zambeziensis OX=60191 PE=4 SV=1	1	1	0.0606	11747.4	8.79
219	tr|A0A224Y6J1|A0A224Y6J1_9ACAR Uncharacterized protein OS=Rhipicephalus zambeziensis OX=60191 PE=4 SV=1	1	1	0.0774	18488.9	11.51
220	tr|A0A224Y6Q5|A0A224Y6Q5_9ACAR Protein containing DUF2039 domain OS=Rhipicephalus zambeziensis OX=60191 PE=4 SV=1	1	1	0.08	13969.8	8.9
221	tr|A0A224YIB1|A0A224YIB1_9ACAR ATP-dependent RNA helicase DHX33 OS=Rhipicephalus zambeziensis OX=60191 PE=4 SV=1	1	1	0.0125	89888.2	9.2
222	tr|A0A224YMW5|A0A224YMW5_9ACAR Proteolytic signal-containing nuclear protein OS=Rhipicephalus zambeziensis OX=60191 PE=4 SV=1	1	1	0.0398	18875.7	8.56
223	tr|A0A224YRN0|A0A224YRN0_9ACAR Innexin OS=Rhipicephalus zambeziensis OX=60191 GN=inx PE=3 SV=1	1	1	0.0156	44234	8.51
224	tr|A0A224YV60|A0A224YV60_9ACAR O-phosphoseryl-tRNA(Sec) kinase OS=Rhipicephalus zambeziensis OX=60191 PE=4 SV=1	1	1	0.0255	35457.6	5.93
225	tr|A0A224YWK6|A0A224YWK6_9ACAR Fragile X mental retardation protein (Fragment) OS=Rhipicephalus zambeziensis OX=60191 PE=4 SV=1	1	1	0.0174	49553.7	9.6
226	tr|A0A224Z2B8|A0A224Z2B8_9ACAR Malonyl coaacp transacylase OS=Rhipicephalus zambeziensis OX=60191 PE=4 SV=1	1	1	0.0142	46865.6	8.65
227	tr|A0A224Z507|A0A224Z507_9ACAR Nuclear pore complex protein Nup188 OS=Rhipicephalus zambeziensis OX=60191 PE=4 SV=1	1	1	0.0052	173372	6.57
228	tr|A0A224Z5M7|A0A224Z5M7_9ACAR Regulator of microtubule dynamics protein 2 OS=Rhipicephalus zambeziensis OX=60191 PE=4 SV=1	1	1	0.0177	38536.9	5.42
229	tr|A0A224ZB15|A0A224ZB15_9ACAR Vacuolar protein sorting-associated protein 72 OS=Rhipicephalus zambeziensis OX=60191 PE=4 SV=1	1	1	0.0273	30125.4	5.94
230	tr|A0A240EVT3|A0A240EVT3_9ACAR Histone H3 (Fragment) OS=Hyalomma isaaci OX=1917743 GN=H3 PE=3 SV=1	1	1	0.0787	9995.57	11.25
231	tr|A0A293LBZ5|A0A293LBZ5_ORNER Huntingtons disease protein huntingtin (Fragment) OS=Ornithodoros erraticus OX=265619 PE=4 SV=1	1	1	0.0185	47408.1	5.51
232	tr|A0A293LC34|A0A293LC34_ORNER Farnesyltransferase alpha subunit (Fragment) OS=Ornithodoros erraticus OX=265619 PE=4 SV=1	1	1	0.0278	38355.5	5.19
233	tr|A0A293LF12|A0A293LF12_ORNER Zinc finger protein (Fragment) OS=Ornithodoros erraticus OX=265619 PE=4 SV=1	1	1	0.0074	135927	7.63
234	tr|A0A293LGV2|A0A293LGV2_ORNER Uncharacterized protein (Fragment) OS=Ornithodoros erraticus OX=265619 PE=4 SV=1	1	1	0.0761	11015.8	11.6
235	tr|A0A293LHD6|A0A293LHD6_ORNER Uncharacterized protein (Fragment) OS=Ornithodoros erraticus OX=265619 PE=4 SV=1	1	1	0.0096	92532.9	8.9
236	tr|A0A293LLS6|A0A293LLS6_ORNER Uncharacterized protein (Fragment) OS=Ornithodoros erraticus OX=265619 PE=4 SV=1	1	1	0.0072	126397	7.52
237	tr|A0A293LRN1|A0A293LRN1_ORNER Uncharacterized protein (Fragment) OS=Ornithodoros erraticus OX=265619 PE=4 SV=1	1	1	0.0116	97233.4	10.42
238	tr|A0A293LTA1|A0A293LTA1_ORNER Multidrug resistance protein (Fragment) OS=Ornithodoros erraticus OX=265619 PE=4 SV=1	1	1	0.0051	130220	8.33
239	tr|A0A293LZ27|A0A293LZ27_ORNER GDP-fucose protein O-fucosyltransferase 1 (Fragment) OS=Ornithodoros erraticus OX=265619 PE=4 SV=1	1	1	0.0199	39740.9	8.07
240	tr|A0A293M3R9|A0A293M3R9_ORNER Uncharacterized protein (Fragment) OS=Ornithodoros erraticus OX=265619 PE=4 SV=1	1	1	0.0473	18636.4	10.25
241	tr|A0A293M7L0|A0A293M7L0_ORNER Uncharacterized protein (Fragment) OS=Ornithodoros erraticus OX=265619 PE=4 SV=1	1	1	0.0843	9076.37	11.43
242	tr|A0A293MCU1|A0A293MCU1_ORNER Glutaryl-CoA dehydrogenase (Fragment) OS=Ornithodoros erraticus OX=265619 PE=4 SV=1	1	1	0.033	20036	9.16
243	tr|A0A293MFE8|A0A293MFE8_ORNER Uncharacterized protein (Fragment) OS=Ornithodoros erraticus OX=265619 PE=4 SV=1	1	1	0.031	37007.1	9.05
244	tr|A0A293ML20|A0A293ML20_ORNER Uncharacterized protein (Fragment) OS=Ornithodoros erraticus OX=265619 PE=4 SV=1	1	1	0.0204	41799.5	10.8
245	tr|A0A293MMY9|A0A293MMY9_ORNER Uncharacterized protein (Fragment) OS=Ornithodoros erraticus OX=265619 PE=4 SV=1	1	1	0.0472	14572.7	9.85
246	tr|A0A293MQS4|A0A293MQS4_ORNER NADPH-dependent diflavin oxidoreductase 1 (Fragment) OS=Ornithodoros erraticus OX=265619 PE=3 SV=1	1	1	0.0121	65954.9	6.7
247	tr|A0A293MRI1|A0A293MRI1_ORNER Uncharacterized protein (Fragment) OS=Ornithodoros erraticus OX=265619 PE=4 SV=1	1	1	0.0067	100741	5.43
248	tr|A0A293MUH4|A0A293MUH4_ORNER Uncharacterized protein (Fragment) OS=Ornithodoros erraticus OX=265619 PE=4 SV=1	1	1	0.015	67946.1	8.56
249	tr|A0A293MX67|A0A293MX67_ORNER Ras-related protein (Fragment) OS=Ornithodoros erraticus OX=265619 PE=4 SV=1	1	1	0.0394	22709.7	6.17
250	tr|A0A293N4N6|A0A293N4N6_ORNER Catalase (Fragment) OS=Ornithodoros erraticus OX=265619 PE=3 SV=1	1	1	0.0181	56537.7	6.15
251	tr|A0A293N5F2|A0A293N5F2_ORNER Uncharacterized protein (Fragment) OS=Ornithodoros erraticus OX=265619 PE=4 SV=1	1	1	0.0377	23875	6.67
252	tr|A0A293N857|A0A293N857_ORNER Uncharacterized protein (Fragment) OS=Ornithodoros erraticus OX=265619 PE=4 SV=1	1	1	0.0063	126871	5.6
253	tr|A0A2R5L410|A0A2R5L410_9ACAR Putative endothelial zinc finger protein induced by tumor necrosis factor alpha (Fragment) OS=Ornithodoros turicata OX=34597 PE=4 SV=1	1	1	0.037	18415	9.89
254	tr|A0A2R5L4N6|A0A2R5L4N6_9ACAR Putative spatacsin OS=Ornithodoros turicata OX=34597 PE=4 SV=1	1	1	0.0028	240306	6.35
255	tr|A0A2R5L5A6|A0A2R5L5A6_9ACAR Putative alternative splicing factor OS=Ornithodoros turicata OX=34597 PE=4 SV=1	1	1	0.0356	62199.4	12.09
256	tr|A0A2R5L5U0|A0A2R5L5U0_9ACAR Putative ww domain-containing protein OS=Ornithodoros turicata OX=34597 PE=4 SV=1	1	1	0.0066	148505	7.86
257	tr|A0A2R5L8K4|A0A2R5L8K4_9ACAR Putative abc transporter atp-binding protein/permease (Fragment) OS=Ornithodoros turicata OX=34597 PE=4 SV=1	1	1	0.0125	70380.8	9.41
258	tr|A0A2R5L9T9|A0A2R5L9T9_9ACAR Putative rhoa gtpase effector dia/diaphanous OS=Ornithodoros turicata OX=34597 PE=4 SV=1	1	1	0.0058	117447	7.5
259	tr|A0A2R5LAE1|A0A2R5LAE1_9ACAR Uncharacterized protein OS=Ornithodoros turicata OX=34597 PE=4 SV=1	1	1	0.0252	26777.2	9.13
260	tr|A0A2R5LAZ1|A0A2R5LAZ1_9ACAR Putative 40s ribosomal protein s3 OS=Ornithodoros turicata OX=34597 PE=4 SV=1	1	1	0.0333	26487.5	9.57
261	tr|A0A2R5LCW1|A0A2R5LCW1_9ACAR Putative plexins functional semaphorin receptor (Fragment) OS=Ornithodoros turicata OX=34597 PE=4 SV=1	1	1	0.0052	215191	6.17
262	tr|A0A2R5LGC2|A0A2R5LGC2_9ACAR Putative glyoxalase OS=Ornithodoros turicata OX=34597 PE=4 SV=1	1	1	0.0203	33292.7	5.82
263	tr|A0A2R5LGN0|A0A2R5LGN0_9ACAR Putative dual specificity phosphatase (Fragment) OS=Ornithodoros turicata OX=34597 PE=4 SV=1	1	1	0.0435	22932	5.97
264	tr|A0A2R5LH55|A0A2R5LH55_9ACAR Putative ribosomal protein s18 OS=Ornithodoros turicata OX=34597 PE=4 SV=1	1	1	0.0588	17825.6	10.76
265	tr|A0A2R5LHU4|A0A2R5LHU4_9ACAR Putative transcription factor a mitochondrial (Fragment) OS=Ornithodoros turicata OX=34597 PE=4 SV=1	1	1	0.0337	24403.6	9.13
266	tr|A0A2R5LIV1|A0A2R5LIV1_9ACAR Putative transcriptional repressor salm (Fragment) OS=Ornithodoros turicata OX=34597 PE=4 SV=1	1	1	0.0061	197158	8.15
267	tr|A0A2R5LIW3|A0A2R5LIW3_9ACAR Putative splicing regulator OS=Ornithodoros turicata OX=34597 PE=4 SV=1	1	1	0.0081	98103.1	9.28
268	tr|A0A2R5LJB8|A0A2R5LJB8_9ACAR Putative rna polymerase-associated protein ctr9 OS=Ornithodoros turicata OX=34597 PE=4 SV=1	1	1	0.0062	144035	9.9
269	tr|A0A2R5LK45|A0A2R5LK45_9ACAR Putative argininosuccinate synthase (Fragment) OS=Ornithodoros turicata OX=34597 PE=4 SV=1	1	1	0.0175	44793.9	5.73
270	tr|A0A2R5LKC5|A0A2R5LKC5_9ACAR Putative cytosol aminopeptidase (Fragment) OS=Ornithodoros turicata OX=34597 PE=4 SV=1	1	1	0.0157	55466.1	8.75
271	tr|A0A2R5LMY9|A0A2R5LMY9_9ACAR Uncharacterized protein (Fragment) OS=Ornithodoros turicata OX=34597 PE=4 SV=1	1	1	0.0094	70438.5	5.94
272	tr|A0A2R5LN87|A0A2R5LN87_9ACAR Putative ran gtpase-activating protein (Fragment) OS=Ornithodoros turicata OX=34597 PE=4 SV=1	1	1	0.0088	77407.9	8.37
273	tr|A0A2R5LNK2|A0A2R5LNK2_9ACAR Putative nucleolar protein OS=Ornithodoros turicata OX=34597 PE=4 SV=1	1	1	0.0124	92542.5	5.48
274	tr|A0JC33|A0JC33_HAELO Cement-like antigen (Fragment) OS=Haemaphysalis longicornis OX=44386 GN=hlim4 PE=2 SV=1	1	1	0.0323	20602.9	9.61
275	tr|A0JC35|A0JC35_HAELO Cement-like antigen (Fragment) OS=Haemaphysalis longicornis OX=44386 GN=hlim13 PE=2 SV=1	1	1	0.0621	15680	10.9
276	tr|B5M758|B5M758_AMBAM 3-hydroxyacyl-coa dehyrogenase (Fragment) OS=Amblyomma americanum OX=6943 PE=2 SV=1	1	1	0.0412	22001.3	8.85
277	tr|B7P2P8|B7P2P8_IXOSC ATP synthase alpha subunit vacuolar, putative (Fragment) (Fragment) OS=Ixodes scapularis OX=6945 GN=8023730 PE=4 SV=1	1	1	0.121	13432.2	9.45
278	tr|B7P3U2|B7P3U2_IXOSC Uncharacterized protein (Fragment) (Fragment) OS=Ixodes scapularis OX=6945 GN=8024194 PE=4 SV=1	1	1	0.0517	12611.8	9.77
279	tr|B7P6A7|B7P6A7_IXOSC ATP synthase subunit alpha OS=Ixodes scapularis OX=6945 GN=8025249 PE=3 SV=1	1	1	0.0156	56300.1	5.85
280	tr|B7P7C0|B7P7C0_IXOSC Fasciclin, putative OS=Ixodes scapularis OX=6945 GN=8025692 PE=4 SV=1	1	1	0.0138	87736.4	5.23
281	tr|B7P7W4|B7P7W4_IXOSC Uncharacterized protein (Fragment) (Fragment) OS=Ixodes scapularis OX=6945 GN=8025898 PE=4 SV=1	1	1	0.0327	29801.3	11.52
282	tr|B7PAG3|B7PAG3_IXOSC uncharacterized protein OS=Ixodes scapularis OX=6945 GN=8026970 PE=4 SV=1	1	1	0.0289	53378.7	5.03
283	tr|B7PB22|B7PB22_IXOSC Calcium-dependent cysteine protease, putative OS=Ixodes scapularis OX=6945 GN=8027228 PE=3 SV=1	1	1	0.0066	117208	6.81
284	tr|B7PDK3|B7PDK3_IXOSC Cuticular protein, putative (Fragment) (Fragment) OS=Ixodes scapularis OX=6945 GN=8028329 PE=4 SV=1	1	1	0.0542	15586	6.31
285	tr|B7PE09|B7PE09_IXOSC RNA-binding protein musashi, putative OS=Ixodes scapularis OX=6945 GN=8028500 PE=4 SV=1	1	1	0.0252	48642.4	8.81
286	tr|B7PEE3|B7PEE3_IXOSC Dynactin P62 subunit, putative OS=Ixodes scapularis OX=6945 GN=8051070 PE=4 SV=1	1	1	0.0129	52938	7.75
287	tr|B7PFG0|B7PFG0_IXOSC uncharacterized protein OS=Ixodes scapularis OX=6945 GN=8050993 PE=4 SV=1	1	1	0.0095	81389.7	5.85
288	tr|B7PFT8|B7PFT8_IXOSC U4/U6 small nuclear ribonucleoprotein Prp4, putative OS=Ixodes scapularis OX=6945 GN=8052038 PE=4 SV=1	1	1	0.0199	42599.4	4.36
289	tr|B7PH02|B7PH02_IXOSC Uncharacterized protein (Fragment) (Fragment) OS=Ixodes scapularis OX=6945 GN=8028818 PE=4 SV=1	1	1	0.0089	87871.9	8.69
290	tr|B7PH72|B7PH72_IXOSC Uncharacterized protein (Fragment) (Fragment) OS=Ixodes scapularis OX=6945 GN=8028897 PE=4 SV=1	1	1	0.0074	92095.6	5.35
291	tr|B7PLE4|B7PLE4_IXOSC Gustatory receptor OS=Ixodes scapularis OX=6945 GN=8051807 PE=4 SV=1	1	1	0.0152	44536.8	8.97
292	tr|B7PNE6|B7PNE6_IXOSC Uncharacterized protein (Fragment) (Fragment) OS=Ixodes scapularis OX=6945 GN=8051376 PE=4 SV=1	1	1	0.0708	12296.1	12.06
293	tr|B7PS35|B7PS35_IXOSC 26 kDa salivary gland protein A, putative OS=Ixodes scapularis OX=6945 GN=8030546 PE=4 SV=1	1	1	0.0343	22907.9	4.68
294	tr|B7PS87|B7PS87_IXOSC AHPC/TSA protein, putative OS=Ixodes scapularis OX=6945 GN=8030602 PE=4 SV=1	1	1	0.0163	47990.3	6.36
295	tr|B7PTZ6|B7PTZ6_IXOSC Pacman protein, putative OS=Ixodes scapularis OX=6945 GN=8031327 PE=4 SV=1	1	1	0.0063	126742	5.85
296	tr|B7PXE6|B7PXE6_IXOSC Phosphatidylinositol 4 kinase, putative (Fragment) (Fragment) OS=Ixodes scapularis OX=6945 GN=8032768 PE=3 SV=1	1	1	0.0039	231866	6.45
297	tr|B7PXE9|B7PXE9_IXOSC THAP domaincontaining protein OS=Ixodes scapularis OX=6945 GN=8032774 PE=4 SV=1	1	1	0.0219	35069.1	9.03
298	tr|B7PZD0|B7PZD0_IXOSC uncharacterized protein OS=Ixodes scapularis OX=6945 GN=8033608 PE=4 SV=1	1	1	0.018	49578.1	6.74
299	tr|B7Q057|B7Q057_IXOSC HEAT repeat-containing protein OS=Ixodes scapularis OX=6945 GN=8033944 PE=4 SV=1	1	1	0.0028	319749	5.81
300	tr|B7Q0G1|B7Q0G1_IXOSC uncharacterized protein OS=Ixodes scapularis OX=6945 GN=8034064 PE=4 SV=1	1	1	0.0285	68275.9	10.18
301	tr|B7Q0Z1|B7Q0Z1_IXOSC GTPase, putative OS=Ixodes scapularis OX=6945 GN=8034272 PE=4 SV=1	1	1	0.0397	28296.4	9.19
302	tr|B7Q2S6|B7Q2S6_IXOSC DEP domain containing protein (Fragment) (Fragment) OS=Ixodes scapularis OX=6945 GN=8035038 PE=4 SV=1	1	1	0.0137	98998.5	8.18
303	tr|B7Q2U6|B7Q2U6_IXOSC Nicotinamide N-methyltransferase, putative OS=Ixodes scapularis OX=6945 GN=8035066 PE=4 SV=1	1	1	0.0203	33106.8	6.2
304	tr|B7Q3E5|B7Q3E5_IXOSC Citrate lyase beta chain, putative (Fragment) (Fragment) OS=Ixodes scapularis OX=6945 GN=8035296 PE=4 SV=1	1	1	0.0248	40909.3	8.45
305	tr|B7Q6K8|B7Q6K8_IXOSC Phosphatidylinositol 3-kinase catalytic subunit, putative OS=Ixodes scapularis OX=6945 GN=8036652 PE=3 SV=1	1	1	0.0122	57080.6	8.47
306	tr|B7Q8M7|B7Q8M7_IXOSC Serpin-2 precursor, putative OS=Ixodes scapularis OX=6945 GN=8037534 PE=3 SV=1	1	1	0.02	39222.4	7.7
307	tr|B7Q953|B7Q953_IXOSC uncharacterized protein OS=Ixodes scapularis OX=6945 GN=8037745 PE=4 SV=1	1	1	0.0366	18932.3	6.64
308	tr|B7QCU5|B7QCU5_IXOSC Sulfotransferase, putative OS=Ixodes scapularis OX=6945 GN=8039334 PE=4 SV=1	1	1	0.0225	35949	5.81
309	tr|B7QF19|B7QF19_IXOSC Fkbp-rapamycin associated protein, putative OS=Ixodes scapularis OX=6945 GN=8040304 PE=3 SV=1	1	1	0.0033	335619	5.74
310	tr|B7QLV7|B7QLV7_IXOSC Similar to transposase domaincontaining protein (Fragment) OS=Ixodes scapularis OX=6945 GN=8043219 PE=4 SV=1	1	1	0.0125	71165.2	8.8
311	tr|F0J8F4|F0J8F4_AMBVA Hypothetical secreted protein 1752 (Fragment) OS=Amblyomma variegatum OX=34610 PE=2 SV=1	1	1	0.05	24207.3	5.8
312	tr|G3BJU6|G3BJU6_HAELO Immunogenic protein OS=Haemaphysalis longicornis OX=44386 PE=2 SV=1	1	1	0.067	19984.5	5.86
313	tr|G3MHA9|G3MHA9_9ACAR Uncharacterized protein (Fragment) OS=Amblyomma maculatum OX=34609 PE=2 SV=1	1	1	0.0421	21096.1	4.75
314	tr|G3MJ53|G3MJ53_9ACAR Uncharacterized protein (Fragment) OS=Amblyomma maculatum OX=34609 PE=2 SV=1	1	1	0.0226	30454.3	8.35
315	tr|G3MMZ3|G3MMZ3_9ACAR Uncharacterized protein OS=Amblyomma maculatum OX=34609 PE=2 SV=1	1	1	0.0538	14816.2	9.89
316	tr|G3MPT6|G3MPT6_9ACAR Annexin OS=Amblyomma maculatum OX=34609 PE=2 SV=1	1	1	0.0177	60779.9	7
317	tr|G3MPV6|G3MPV6_9ACAR Uncharacterized protein OS=Amblyomma maculatum OX=34609 PE=2 SV=1	1	1	0.0168	53681.2	7.35
318	tr|G3MR59|G3MR59_9ACAR Uncharacterized protein OS=Amblyomma maculatum OX=34609 PE=2 SV=1	1	1	0.0347	23144.6	10.54
319	tr|L7LSK2|L7LSK2_9ACAR Putative toll-like receptor 5 OS=Rhipicephalus pulchellus OX=72859 PE=2 SV=1	1	1	0.0289	38832.9	6.55
320	tr|L7LUL8|L7LUL8_9ACAR Uncharacterized protein OS=Rhipicephalus pulchellus OX=72859 PE=2 SV=1	1	1	0.0141	68476.1	8.93
321	tr|L7LY53|L7LY53_9ACAR Putative myosin light chain binding protein OS=Rhipicephalus pulchellus OX=72859 PE=2 SV=1	1	1	0.0097	93262.9	6.24
322	tr|L7LYM9|L7LYM9_9ACAR Uncharacterized protein OS=Rhipicephalus pulchellus OX=72859 PE=2 SV=1	1	1	0.0069	96304.4	5.41
323	tr|L7LZR8|L7LZR8_9ACAR Ribosome biogenesis protein NOP53 OS=Rhipicephalus pulchellus OX=72859 PE=2 SV=1	1	1	0.0133	52632	9.93
324	tr|L7MBX0|L7MBX0_9ACAR Putative dna-binding cell division cycle control protein (Fragment) OS=Rhipicephalus pulchellus OX=72859 PE=2 SV=1	1	1	0.0156	50032.9	5.67
325	tr|L7MCS1|L7MCS1_9ACAR Putative mrna splicing factor atp-dependent rna helicase (Fragment) OS=Rhipicephalus pulchellus OX=72859 PE=2 SV=1	1	1	0.0137	73563.1	8.91
326	tr|L7MG08|L7MG08_9ACAR Uncharacterized protein (Fragment) OS=Rhipicephalus pulchellus OX=72859 PE=2 SV=1	1	1	0.0221	50809.6	9.3
327	tr|L7MJ09|L7MJ09_9ACAR Uncharacterized protein (Fragment) OS=Rhipicephalus pulchellus OX=72859 PE=2 SV=1	1	1	0.0678	13425.5	9.72
328	tr|L7MLB2|L7MLB2_9ACAR Putative cadherin egf lag seven-pass g-type receptor (Fragment) OS=Rhipicephalus pulchellus OX=72859 PE=2 SV=1	1	1	0.0019	405579	4.9
329	tr|M9WB33|M9WB33_ORNMO Heat shock protein 90 OS=Ornithodoros moubata OX=6938 PE=2 SV=1	1	1	0.0288	26642.5	5.46
330	tr|M5AYG7|M5AYG7_HAELO Ferritin OS=Haemaphysalis longicornis OX=44386 GN=fer2 PE=2 SV=1	1	1	0.0503	22560.3	5.29
331	tr|Q09JM2|Q09JM2_ARGMO 7DB family (Fragment) OS=Argas monolakensis OX=34602 PE=2 SV=1	1	1	0.1075	10418.6	8.17
332	tr|Q0EDB3|Q0EDB3_HAELO Uncharacterized protein hlim3 OS=Haemaphysalis longicornis OX=44386 GN=hlim3 PE=2 SV=1	1	1	0.0187	33371.2	9.1
333	tr|Q4R1A6|Q4R1A6_HAELO Metalloprotease OS=Haemaphysalis longicornis OX=44386 PE=2 SV=1	1	1	0.0164	61800.3	6.62
334	tr|Q6WNX5|Q6WNX5_9ACAR Ferritin OS=Amblyomma maculatum OX=34609 GN=Fer PE=2 SV=1	1	1	0.0581	19870.1	4.97
335	tr|Q86GZ5|Q86GZ5_RHIAP Midgut cysteine proteinase 2 OS=Rhipicephalus appendiculatus OX=34631 PE=2 SV=1	1	1	0.016	63425.5	6.81
336	tr|V5GJ96|V5GJ96_IXORI Putative tick kunitz 89 OS=Ixodes ricinus OX=34613 PE=2 SV=1	1	1	0.0552	21570.3	9.63
337	tr|V5H108|V5H108_IXORI DNA-directed RNA polymerase III subunit RPC6 OS=Ixodes ricinus OX=34613 PE=2 SV=1	1	1	0.024	37353.6	8.9
338	tr|V5H6E9|V5H6E9_IXORI Putative microtubule-based movement (Fragment) OS=Ixodes ricinus OX=34613 PE=2 SV=1	1	1	0.0335	43428.9	5.99
339	tr|V5H941|V5H941_IXORI Putative cytotoxin OS=Ixodes ricinus OX=34613 PE=2 SV=1	1	1	0.0475	32646.8	9.14
340	tr|V5HCG2|V5HCG2_IXORI Putative yth domain-containing protein 1 (Fragment) OS=Ixodes ricinus OX=34613 PE=2 SV=1	1	1	0.0331	74119.5	10.41
341	tr|V5HCM2|V5HCM2_IXORI Putative secreted protein OS=Ixodes ricinus OX=34613 PE=2 SV=1	1	1	0.0526	16444.8	7.78
342	tr|V5HD53|V5HD53_IXORI Putative serine/arginine repetitive matrix 2 (Fragment) OS=Ixodes ricinus OX=34613 PE=2 SV=1	1	1	0.008	118159	11.67
343	tr|V5HG79|V5HG79_IXORI Putative short stop (Fragment) OS=Ixodes ricinus OX=34613 PE=2 SV=1	1	1	0.0012	634580	6.1
344	tr|V5HIK9|V5HIK9_IXORI Putative ras-related protein rab-11a OS=Ixodes ricinus OX=34613 PE=2 SV=1	1	1	0.032	24492.2	6.06
345	tr|V5HX11|V5HX11_IXORI Putative importin 13 OS=Ixodes ricinus OX=34613 PE=2 SV=1	1	1	0.032	40465.8	5.74
346	tr|V5HY02|V5HY02_IXORI Putative tick metalloprotease (Fragment) OS=Ixodes ricinus OX=34613 PE=2 SV=1	1	1	0.0292	30375.4	8.67
347	tr|V5HYW4|V5HYW4_IXORI Putative exonuclease mut-7 (Fragment) OS=Ixodes ricinus OX=34613 PE=2 SV=1	1	1	0.0082	84695.4	6.47
348	tr|V5HZQ9|V5HZQ9_IXORI Putative endoribonuclease dcr-1 (Fragment) OS=Ixodes ricinus OX=34613 PE=2 SV=1	1	1	0.0155	101449	5.01
349	tr|V5I297|V5I297_IXORI Putative ga11514-pa protein OS=Ixodes ricinus OX=34613 PE=2 SV=1	1	1	0.0393	20713.2	10.18
350	tr|V5I529|V5I529_IXORI Putative secreted protein (Fragment) OS=Ixodes ricinus OX=34613 PE=2 SV=1	1	1	0.0255	26085.8	7.84
351	tr|V5I557|V5I557_IXORI Putative negative regulation of translation involved in protein silencing by mirna (Fragment) OS=Ixodes ricinus OX=34613 PE=2 SV=1	1	1	0.0148	60223.7	8.81
352	tr|V5ICC2|V5ICC2_IXORI Uncharacterized protein OS=Ixodes ricinus OX=34613 PE=2 SV=1	1	1	0.0161	62259.4	9.07
353	tr|V5ICE2|V5ICE2_IXORI Putative secreted protein OS=Ixodes ricinus OX=34613 PE=2 SV=1	1	1	0.0385	23118.6	9.72
354	tr|V5IET3|V5IET3_IXORI Putative regulation of transcription OS=Ixodes ricinus OX=34613 PE=2 SV=1	1	1	0.0257	35331.3	9.73
355	tr|V5IF43|V5IF43_IXORI Putative lamin OS=Ixodes ricinus OX=34613 PE=2 SV=1	1	1	0.0132	69843.8	6.2
356	tr|V5IGI0|V5IGI0_IXORI Putative hemolectin (Fragment) OS=Ixodes ricinus OX=34613 PE=2 SV=1	1	1	0.0288	26642.5	5.46
